# Supplementary material for: Higher circulating adiponectin levels are associated with increased risk of atrial fibrillation in older adults
Source: HighWire-hosted journal article supplement (doi:10.1136/heartjnl-2014-307015), 2015-04-08
Supplement: heartjnl-2014-307015supp.pdf [file heartjnl-2014-307015supp.pdf]

**SUPPLEMENTARY MATERIAL**

**Supplementary Table 1: Characteristics of the Study Population by Quartiles of High Molecular Weight Adiponectin**

| <b>Quartile (n)</b>                 | <b>Q1 (798)</b> | <b>Q2 (797)</b> | <b>Q3 (798)</b> | <b>Q4 (797)</b> |
|-------------------------------------|-----------------|-----------------|-----------------|-----------------|
| Adiponectin, mg/l                   | <3.8            | 3.8-6.2         | >6.2-9.9        | >9.9            |
| Age, years                          | 73±5            | 74±4            | 75±5            | 76±6            |
| Men, n (%)                          | 470 (58.9)      | 334 (41.9)      | 226 (28.3)      | 129 (16.2)      |
| African-American, n (%)             | 241 (30.2)      | 128 (16.1)      | 80 (10.0)       | 75 (9.4)        |
| Education < high school, n (%)      | 231 (28.9)      | 212 (26.6)      | 188 (23.6)      | 176 (22.1)      |
| BMI, kg/m <sup>2</sup>              | 28.7±4.7        | 27.5±4.5        | 26.6±4.7        | 24.6±4.1        |
| Height, cm                          | 167±9           | 165±9           | 163±9           | 160±8           |
| Weight, kg                          | 177±31          | 165±29          | 155±30          | 139±27          |
| Systolic blood pressure, mmHg       | 136±21          | 137±21          | 137±21          | 135±20          |
| Diastolic blood pressure, mmHg      | 73±11           | 73±11           | 72±11           | 71±11           |
| Anti-hypertensive medication, n (%) | 357 (44.7)      | 350 (43.9)      | 309 (38.7)      | 261 (32.7)      |
| Diabetes, n (%)                     | 201 (25.6)      | 82 (10.5)       | 64 (8.1)        | 38 (4.9)        |
| HOMA-IR                             | 6.2±11.6        | 3.5±4.4         | 3.0±6.7         | 2.2±2.3         |
| LDL, mg/dl                          | 126±35          | 128±33          | 130±33          | 125±34          |

|                                          |                |                |                |                |
|------------------------------------------|----------------|----------------|----------------|----------------|
| HDL, mg/dl                               | 47±12          | 51±12          | 56±13          | 64±15          |
| Triglyceride (mg/dl)                     | 143 (102, 205) | 131 (95, 180)  | 120 (89, 160)  | 98 (73, 133)   |
| Lipid-lowering medication, n (%)         | 54 (6.8)       | 60 (7.5)       | 47 (5.9)       | 37 (4.6)       |
| Current smoker, n (%)                    | 92 (11.5)      | 78 (9.8)       | 90 (11.3)      | 74 (9.3)       |
| Alcohol use ≥7 drinks/week, n (%)        | 90 (11.3)      | 103 (12.9)     | 107 (13.4)     | 121 (15.2)     |
| Estrogen replacement (women), n (%)      | 34 (4.3)       | 68 (8.5)       | 84 (10.5)      | 107 (13.4)     |
| ACE inhibitor medication, n (%)          | 87 (10.9)      | 72 (9.0)       | 65 (8.1)       | 43 (5.4)       |
| Beta-blocker medication, n (%)           | 99 (12.4)      | 73 (9.2)       | 61 (7.6)       | 32 (4.0)       |
| Self-reported health fair/poor, n (%)    | 130 (16.3)     | 109 (13.7)     | 110 (13.8)     | 130 (16.3)     |
| Unintentional weight loss >10 lbs, n (%) | 34 (4.6)       | 25 (3.5)       | 30 (4.1)       | 47 (6.6)       |
| eGFR, ml/min/m <sup>1.73</sup>           | 75±19          | 74±17          | 74±17          | 77±19          |
| hsCRP, mg/l                              | 3.4 (1.7, 6.5) | 2.8 (1.3, 5.9) | 2.2 (1.1, 5.4) | 1.6 (0.8, 3.6) |
| NT-proBNP <sub>1-76</sub> , ng/l         | 70 (40, 134)   | 99 (59, 179)   | 132 (74, 232)  | 168 (98, 286)  |
| Subclinical CVD, n (%)                   | 527 (67.6)     | 496 (63.7)     | 470 (60.6)     | 465 (60.2)     |
| High LA diameter index†, n (%)           | 33 (5.0)       | 40 (6.0)       | 35 (5.4)       | 69 (11.0)      |
| Low LVEF (<55%)†, n (%)                  | 43 (6.8)       | 36 (5.6)       | 32 (5.0)       | 39 (6.3)       |
| Transmitral E/A ratio†, n (%)            |                |                |                |                |
| <0.7                                     | 156 (23.7)     | 174 (26.3)     | 161 (25.0)     | 120 (19.4)     |

|                               |            |            |             |            |
|-------------------------------|------------|------------|-------------|------------|
| 0.7-1.5                       | 490 (74.5) | 470 (71.1) | 470 (73.10) | 478 (77.2) |
| >1.5                          | 12 (1.8)   | 17 (2.6)   | 12 (1.9)    | 21 (3.4)   |
| Incident AF, n (%)            | 206 (25.8) | 216 (27.1) | 235 (29.4)  | 229 (28.7) |
| Incident HF before AF, n (%)  | 170 (21.3) | 157 (19.7) | 149 (18.7)  | 143 (17.9) |
| Incident CHD before AF, n (%) | 242 (30.3) | 216 (27.1) | 203 (25.4)  | 161 (20.2) |

---

\*Continuous values as presented as means±SD or as medians (interquartile range).

ACE, angiotensin converting enzyme; AF, atrial fibrillation; BMI, body mass index; CHD, coronary heart disease; CVD, cardiovascular disease; eGFR, estimated glomerular filtration rate; HF, heart failure; HDL, high density lipoprotein; HOMA-IR, homeostasis model assessment–insulin resistance; hsCRP, high-sensitivity C-reactive protein; LDL, low density lipoprotein; LA, left atrial; LVEF, left ventricular ejection fraction; NT-proBNP<sub>1-76</sub>, amino-terminal pro-B-type natriuretic peptide 1-76; wt, weight.

†Obtained 2 years after the 1992-93 baseline (i.e., at the 1994-95 examination)
